# Supplementary material for: Ni spin coupling and NixN (x = 1, 4) (111) growth at low and room temperatures and different strains using the CrN (111) surface as initial substrate
Source: Royal Society of Chemistry journal article supplement (doi:10.1039/d4ce00473f), 2024-01-01
Supplement: d4ce00473f1.pdf [file d4ce00473f1.pdf]

## Supplementary information

### Ni spin coupling and Ni<sub>x</sub>N (x=1,4) (111) growth at low and room temperatures and different strains, using CrN (111) surface as initial substrate.

J. C. Moreno H.<sup>1\*</sup>, Gregorio H. Coccoletzi<sup>2</sup> and Wilfrido Calleja A<sup>3</sup>.

<sup>1</sup>Universidad Autónoma de Puebla, Instituto de Física, Apartado Postal J-48, Puebla 72570, México

<sup>2</sup>On sabbatical leave at Instituto Nacional de Astrofísica Óptica y Electrónica, Tonantzintla Puebla, México.

<sup>3</sup>National Institute of Astrophysics, Optics and Electronics, INAOE, Electronics Group, Tonantzintla, Puebla 72840, Mexico

CrN bulk was studied by local density approximation (LDA)<sup>1</sup> and general gradient approximation (GGA)<sup>2</sup>, including different Hubbard parameters ( $U_{\text{eff}}=U-J$ ), such as introduced by Cococcioni<sup>3</sup>. This test is performed with the main aim to determine which approximation provide results closer to experimental data, specifically, lattice constant and Cr magnetic moment. In fact, this way of determining the Hubbard parameter has been used in different works<sup>4-6</sup>. Note CrN bulk was modeled with an antiferromagnetic arrangement, forming by alternating single ferromagnetic layers along [100] direction with a rock-salt crystal structure, as reported in a previous work <sup>7</sup>. Additionally, a Monkhorst-Pack <sup>8</sup> grid of 10×10×10 is employed for the whole calculations. The results are listed in the **tables S1** and **S2**. According to the results, the combination LDA+U=4 eV is a good agreement with the lattice constant and Cr magnetic moment. Indeed, this Hubbard parameter has been employed in a previous work <sup>9</sup>. Therefore, this combination is employed to development the all calculations.

**Table S1.** Lattice constant (a) as function of the different approximations with different  $U_{\text{eff}}$  values.

|                         | a (Å)       |                         | a (Å) | Experimental <sup>10</sup> |
|-------------------------|-------------|-------------------------|-------|----------------------------|
| LDA                     | 3.98        | GGA                     | 4.13  |                            |
| LDA- $U_{\text{eff}}=1$ | 4.03        | GGA- $U_{\text{eff}}=1$ | 4.18  |                            |
| LDA- $U_{\text{eff}}=2$ | 4.10        | GGA- $U_{\text{eff}}=2$ | 4.20  | a=4.14 Å                   |
| LDA- $U_{\text{eff}}=3$ | 4.12        | GGA- $U_{\text{eff}}=3$ | 4.21  |                            |
| LDA- $U_{\text{eff}}=4$ | <b>4.13</b> | GGA- $U_{\text{eff}}=4$ | 4.22  |                            |

|                         |      |                         |      |
|-------------------------|------|-------------------------|------|
| LDA- $U_{\text{eff}}=5$ | 4.16 | GGA- $U_{\text{eff}}=5$ | 4.24 |
|-------------------------|------|-------------------------|------|

**Table S2.** Cr magnetic moment ( $m_{\text{Cr}}$ ) as function of the different approximations with different  $U_{\text{eff}}$  values.

|                         | $m_{\text{Cr}}(\mu_{\text{B}})$ |                         | $m_{\text{Cr}}(\mu_{\text{B}})$ | Experimental <sup>11</sup>          |
|-------------------------|---------------------------------|-------------------------|---------------------------------|-------------------------------------|
| LDA                     | 1.48                            | GGA                     | 2.05                            |                                     |
| LDA- $U_{\text{eff}}=1$ | 1.95                            | GGA- $U_{\text{eff}}=1$ | 2.32                            |                                     |
| LDA- $U_{\text{eff}}=2$ | 2.28                            | GGA- $U_{\text{eff}}=2$ | 2.41                            | $m_{\text{Cr}}=2.36 \mu_{\text{B}}$ |
| LDA- $U_{\text{eff}}=3$ | 2.38                            | GGA- $U_{\text{eff}}=3$ | 2.47                            |                                     |
| LDA- $U_{\text{eff}}=4$ | <b>2.47</b>                     | GGA- $U_{\text{eff}}=4$ | 2.55                            |                                     |
| LDA- $U_{\text{eff}}=5$ | 2.55                            | GGA- $U_{\text{eff}}=5$ | 2.63                            |                                     |

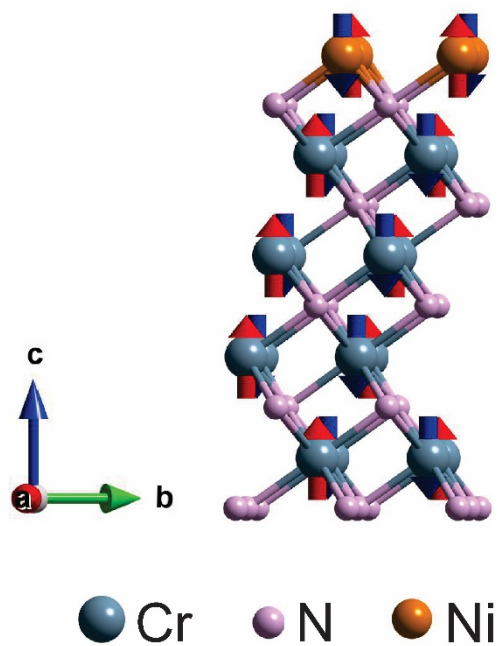

**Figure S1.** Spin configuration of NiN model. The red and blues arrows represent the spins up and down, respectively.

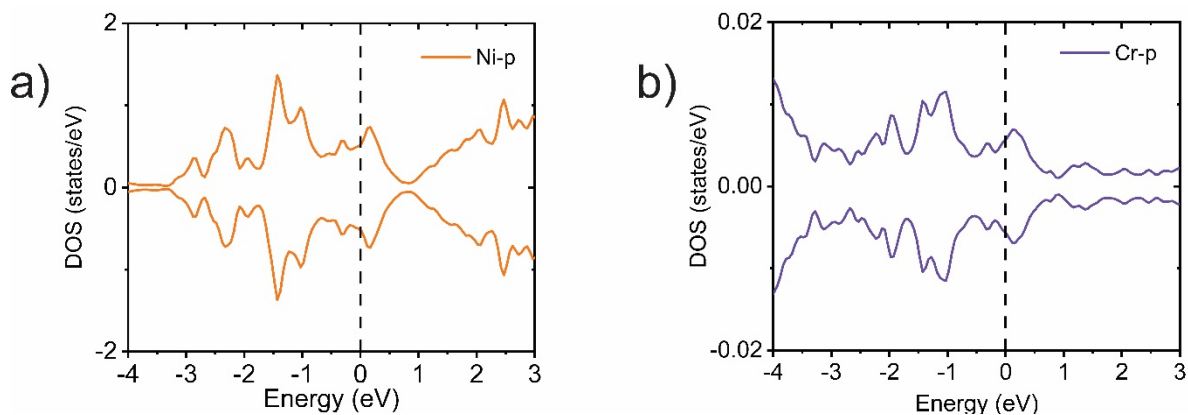

**Figure S2.** Projected density of states for first two layer: a) Ni-p and b) Cr-p of NiN model.

In addition, the atomic positions, in xyz format, the different structures are presented, with the aim of the reader can reproduce our data. Figure S1 is helpfully to build the spin arrangement for each structure.

Model: A full Ni adsorption at H3 site

89

XCrySDen XSF file

|    |           |          |          |
|----|-----------|----------|----------|
| Ni | 1.324877  | 0.924132 | 5.615734 |
| Ni | -0.145121 | 3.461629 | 5.616427 |
| Ni | 4.242715  | 0.928313 | 5.616391 |
| Ni | 2.787416  | 3.457323 | 5.615734 |
| Cr | 5.668386  | 0.105201 | 7.419344 |
| Cr | 4.206172  | 2.638326 | 7.420658 |
| Cr | 2.743522  | 0.104953 | 7.420658 |
| Cr | 1.280453  | 2.638574 | 7.419380 |
| N  | -0.090395 | 1.741108 | 8.612111 |
| N  | -1.552494 | 4.274177 | 8.612622 |
| N  | 2.835446  | 1.740799 | 8.612622 |
| N  | 1.372258  | 4.274496 | 8.612111 |
| Cr | 1.385881  | 0.888777 | 9.820870 |

|    |           |          |           |
|----|-----------|----------|-----------|
| Cr | -0.076616 | 3.422078 | 9.821162  |
| Cr | 4.311334  | 0.888695 | 9.821162  |
| Cr | 2.848537  | 3.422169 | 9.820870  |
| N  | 5.778224  | 0.041786 | 11.014259 |
| N  | 4.315467  | 2.575234 | 11.014295 |
| N  | 2.852814  | 0.041846 | 11.014295 |
| N  | 1.390284  | 2.575163 | 11.014295 |
| Cr | -0.096506 | 1.744640 | 12.222580 |
| Cr | -1.559164 | 4.278028 | 12.222617 |
| Cr | 2.828794  | 1.744640 | 12.222617 |
| Cr | 1.366144  | 4.278022 | 12.222580 |
| N  | 1.411343  | 0.874083 | 13.423270 |
| N  | -0.051298 | 3.407461 | 13.423234 |
| N  | 4.336652  | 0.874078 | 13.423270 |
| N  | 2.873993  | 3.407466 | 13.423270 |
| Cr | 5.813899  | 0.021189 | 14.635645 |
| Cr | 4.351257  | 2.554567 | 14.635645 |
| Cr | 2.888608  | 0.021184 | 14.635645 |
| Cr | 1.425949  | 2.554572 | 14.635645 |
| N  | -0.013696 | 1.696829 | 15.842615 |
| N  | -1.476337 | 4.230207 | 15.842580 |
| N  | 2.911613  | 1.696824 | 15.842580 |
| N  | 1.448954  | 4.230212 | 15.842615 |
| Cr | 1.480646  | 0.834071 | 17.051886 |
| Cr | 0.017997  | 3.367454 | 17.051886 |
| Cr | 4.405946  | 0.834071 | 17.051886 |
| Cr | 2.943296  | 3.367454 | 17.051886 |
| N  | 0.000000  | 0.000000 | 18.255899 |
| N  | -2.925300 | 5.066766 | 18.255899 |

|    |           |          |           |
|----|-----------|----------|-----------|
| N  | 5.850600  | 0.000000 | 18.255899 |
| N  | 2.925300  | 5.066766 | 18.255899 |
| N  | -1.462650 | 2.533383 | 18.255899 |
| N  | 4.387950  | 2.533383 | 18.255899 |
| N  | 2.925300  | 0.000000 | 18.255899 |
| N  | 0.000000  | 5.066766 | 18.255899 |
| N  | 1.462650  | 2.533383 | 18.255899 |
| Cr | -0.014986 | 1.697574 | 19.456919 |
| Cr | -1.477636 | 4.230957 | 19.456919 |
| Cr | 2.910314  | 1.697574 | 19.456919 |
| Cr | 1.447664  | 4.230957 | 19.456919 |
| N  | 1.478251  | 0.835454 | 20.666372 |
| N  | 0.015592  | 3.368842 | 20.666372 |
| N  | 4.403542  | 0.835459 | 20.666372 |
| N  | 2.940901  | 3.368837 | 20.666372 |
| Cr | -2.884536 | 5.043231 | 21.871664 |
| Cr | -1.421895 | 2.509853 | 21.871664 |
| Cr | 0.040755  | 5.043236 | 21.871664 |
| Cr | 1.503414  | 2.509848 | 21.871664 |
| N  | 0.054984  | 1.657177 | 23.084877 |
| N  | -1.407674 | 4.190565 | 23.084877 |
| N  | 2.980275  | 1.657182 | 23.084877 |
| N  | 1.517634  | 4.190560 | 23.084877 |
| Cr | 1.564527  | 0.785643 | 24.286152 |
| Cr | 0.101877  | 3.319026 | 24.286114 |
| Cr | 4.489835  | 0.785637 | 24.286114 |
| Cr | 3.027182  | 3.319026 | 24.286152 |
| N  | -2.847800 | 5.022021 | 25.497429 |
| N  | -1.385085 | 2.488608 | 25.497429 |

|    |           |          |           |
|----|-----------|----------|-----------|
| N  | 0.077559  | 5.021981 | 25.497429 |
| N  | 1.540141  | 2.488643 | 25.497429 |
| Cr | 0.081461  | 1.641901 | 26.690525 |
| Cr | -1.381277 | 4.175324 | 26.690346 |
| Cr | 3.006653  | 1.641956 | 26.690308 |
| Cr | 1.544102  | 4.175268 | 26.690525 |
| N  | 1.555716  | 0.790740 | 27.901150 |
| N  | 0.092776  | 3.324280 | 27.900856 |
| N  | 4.480717  | 0.790902 | 27.900747 |
| N  | 3.018357  | 3.324107 | 27.901150 |
| Cr | -2.744920 | 4.962624 | 29.092274 |
| Cr | -1.282524 | 2.429377 | 29.091505 |
| Cr | 0.180134  | 4.962775 | 29.091505 |
| Cr | 1.643074  | 2.429215 | 29.092344 |
| Ni | 0.127953  | 1.614981 | 30.896612 |
| Ni | -1.330069 | 4.145760 | 30.896101 |
| Ni | 3.057933  | 1.612346 | 30.896246 |
| Ni | 1.590661  | 4.148465 | 30.896612 |

Model: A full Ni adsorption at T4 site

89

XCrySDen XSF file

|    |           |          |          |
|----|-----------|----------|----------|
| Ni | -0.217394 | 1.814171 | 5.613105 |
| Ni | -1.681483 | 4.348648 | 5.612849 |
| Ni | 2.706625  | 1.815174 | 5.612849 |
| Ni | 1.245490  | 4.347949 | 5.613105 |
| Cr | 5.710089  | 0.081124 | 7.427742 |
| Cr | 4.247331  | 2.614583 | 7.427486 |
| Cr | 2.784669  | 0.081180 | 7.427486 |

|    |           |          |           |
|----|-----------|----------|-----------|
| Cr | 1.322104  | 2.614527 | 7.427705  |
| N  | -0.057304 | 1.722006 | 8.620472  |
| N  | -1.520076 | 4.255460 | 8.620436  |
| N  | 2.867899  | 1.722062 | 8.620436  |
| N  | 1.405346  | 4.255389 | 8.620472  |
| Cr | 1.412224  | 0.873581 | 9.831861  |
| Cr | -0.050447 | 3.406969 | 9.831823  |
| Cr | 4.337503  | 0.873586 | 9.831823  |
| Cr | 2.874868  | 3.406954 | 9.831861  |
| N  | 5.800639  | 0.028845 | 11.021708 |
| N  | 4.338006  | 2.562218 | 11.021708 |
| N  | 2.875356  | 0.028835 | 11.021708 |
| N  | 1.412680  | 2.562233 | 11.021708 |
| Cr | -0.077585 | 1.733716 | 12.230139 |
| Cr | -1.540235 | 4.267098 | 12.230139 |
| Cr | 2.847715  | 1.733716 | 12.230139 |
| Cr | 1.385065  | 4.267098 | 12.230139 |
| N  | 1.424320  | 0.866594 | 13.429150 |
| N  | -0.038336 | 3.399977 | 13.429150 |
| N  | 4.349614  | 0.866594 | 13.429150 |
| N  | 2.886967  | 3.399972 | 13.429150 |
| Cr | 5.821060  | 0.017055 | 14.641560 |
| Cr | 4.358410  | 2.550438 | 14.641560 |
| Cr | 2.895760  | 0.017055 | 14.641560 |
| Cr | 1.433110  | 2.550438 | 14.641560 |
| N  | -0.009923 | 1.694651 | 15.846486 |
| N  | -1.472581 | 4.228039 | 15.846522 |
| N  | 2.915377  | 1.694651 | 15.846522 |
| N  | 1.452728  | 4.228034 | 15.846486 |

|    |           |          |           |
|----|-----------|----------|-----------|
| Cr | 1.480919  | 0.833914 | 17.055063 |
| Cr | 0.018269  | 3.367296 | 17.055027 |
| Cr | 4.406218  | 0.833914 | 17.055027 |
| Cr | 2.943568  | 3.367296 | 17.055063 |
| N  | 0.000000  | 0.000000 | 18.255899 |
| N  | -2.925300 | 5.066766 | 18.255899 |
| N  | 5.850600  | 0.000000 | 18.255899 |
| N  | 2.925300  | 5.066766 | 18.255899 |
| N  | -1.462650 | 2.533383 | 18.255899 |
| N  | 4.387950  | 2.533383 | 18.255899 |
| N  | 2.925300  | 0.000000 | 18.255899 |
| N  | 0.000000  | 5.066766 | 18.255899 |
| N  | 1.462650  | 2.533383 | 18.255899 |
| Cr | -0.018268 | 1.699469 | 19.456774 |
| Cr | -1.480918 | 4.232852 | 19.456774 |
| Cr | 2.907032  | 1.699469 | 19.456774 |
| Cr | 1.444381  | 4.232852 | 19.456774 |
| N  | 1.472573  | 0.838732 | 20.665167 |
| N  | 0.009923  | 3.372115 | 20.665167 |
| N  | 4.397882  | 0.838727 | 20.665167 |
| N  | 2.935223  | 3.372115 | 20.665167 |
| Cr | -2.895760 | 5.049711 | 21.870058 |
| Cr | -1.433110 | 2.516328 | 21.870058 |
| Cr | 0.029540  | 5.049711 | 21.870058 |
| Cr | 1.492190  | 2.516328 | 21.870058 |
| N  | 0.038333  | 1.666794 | 23.082468 |
| N  | -1.424314 | 4.200171 | 23.082468 |
| N  | 2.963636  | 1.666789 | 23.082468 |
| N  | 1.500980  | 4.200171 | 23.082468 |



|    |           |          |           |
|----|-----------|----------|-----------|
| Cr | 1.540235  | 0.799667 | 24.281662 |
| Cr | 0.077585  | 3.333050 | 24.281696 |
| Cr | 4.465535  | 0.799667 | 24.281696 |
| Cr | 3.002885  | 3.333050 | 24.281662 |
| N  | -2.875338 | 5.037920 | 25.490128 |
| N  | -1.412706 | 2.504548 | 25.490166 |
| N  | 0.049944  | 5.037931 | 25.490166 |
| N  | 1.512620  | 2.504533 | 25.490166 |
| Cr | 0.050432  | 1.659812 | 26.680084 |
| Cr | -1.412203 | 4.193179 | 26.680120 |
| Cr | 2.975747  | 1.659796 | 26.680120 |
| Cr | 1.513076  | 4.193184 | 26.680084 |
| N  | 1.519954  | 0.811377 | 27.891399 |
| N  | 0.057400  | 3.344704 | 27.891436 |
| N  | 4.445376  | 0.811306 | 27.891436 |
| N  | 2.982604  | 3.344759 | 27.891399 |
| Cr | -2.784789 | 4.985642 | 29.084095 |
| Cr | -1.322031 | 2.452183 | 29.084349 |
| Cr | 0.140631  | 4.985586 | 29.084349 |
| Cr | 1.603196  | 2.452239 | 29.084167 |
| Ni | 1.679810  | 0.718817 | 30.898767 |
| Ni | 0.218675  | 3.251592 | 30.899021 |
| Ni | 4.606782  | 0.718118 | 30.899021 |
| Ni | 3.142691  | 3.252600 | 30.898767 |

Model: A full Ni incorporation at H3 site.

89

XCrySDen XSF file

|    |          |          |          |
|----|----------|----------|----------|
| Cr | 1.385311 | 0.889116 | 5.526243 |
|----|----------|----------|----------|

|    |           |          |           |
|----|-----------|----------|-----------|
| Cr | -0.077353 | 3.422504 | 5.526243  |
| Cr | 4.310605  | 0.889116 | 5.526280  |
| Cr | 2.847958  | 3.422494 | 5.526243  |
| Ni | 5.764464  | 0.049730 | 7.658533  |
| Ni | 4.301797  | 2.583133 | 7.658533  |
| Ni | 2.839138  | 0.049735 | 7.658533  |
| Ni | 1.376506  | 2.583118 | 7.658496  |
| N  | -0.086425 | 1.738823 | 8.598018  |
| N  | -1.549063 | 4.272196 | 8.598018  |
| N  | 2.838895  | 1.738808 | 8.598018  |
| N  | 1.376222  | 4.272201 | 8.598018  |
| Cr | 1.382538  | 0.890717 | 9.820104  |
| Cr | -0.080144 | 3.424115 | 9.820104  |
| Cr | 4.307796  | 0.890737 | 9.820104  |
| Cr | 2.845185  | 3.424095 | 9.820104  |
| N  | 5.764728  | 0.049578 | 11.018020 |
| N  | 4.302078  | 2.582961 | 11.018020 |
| N  | 2.839428  | 0.049578 | 11.018020 |
| N  | 1.376778  | 2.582961 | 11.018020 |
| Cr | -0.103070 | 1.748429 | 12.221813 |
| Cr | -1.565720 | 4.281812 | 12.221813 |
| Cr | 2.822230  | 1.748429 | 12.221813 |
| Cr | 1.359580  | 4.281812 | 12.221813 |
| N  | 1.402936  | 0.878937 | 13.426594 |
| N  | -0.059714 | 3.412320 | 13.426594 |
| N  | 4.328236  | 0.878937 | 13.426594 |
| N  | 2.865586  | 3.412320 | 13.426594 |
| Cr | 5.813618  | 0.021351 | 14.635135 |
| Cr | 4.350968  | 2.554734 | 14.635135 |

|    |           |          |           |
|----|-----------|----------|-----------|
| Cr | 2.888318  | 0.021351 | 14.635135 |
| Cr | 1.425668  | 2.554734 | 14.635135 |
| N  | -0.015592 | 1.697924 | 15.844075 |
| N  | -1.478241 | 4.231307 | 15.844075 |
| N  | 2.909708  | 1.697924 | 15.844075 |
| N  | 1.447058  | 4.231307 | 15.844075 |
| Cr | 1.480243  | 0.834304 | 17.052544 |
| Cr | 0.017593  | 3.367687 | 17.052544 |
| Cr | 4.405543  | 0.834304 | 17.052544 |
| Cr | 2.942893  | 3.367687 | 17.052544 |
| N  | 0.000000  | 0.000000 | 18.255899 |
| N  | -2.925300 | 5.066766 | 18.255899 |
| N  | 5.850600  | 0.000000 | 18.255899 |
| N  | 2.925300  | 5.066766 | 18.255899 |
| N  | -1.462650 | 2.533383 | 18.255899 |
| N  | 4.387950  | 2.533383 | 18.255899 |
| N  | 2.925300  | 0.000000 | 18.255899 |
| N  | 0.000000  | 5.066766 | 18.255899 |
| N  | 1.462650  | 2.533383 | 18.255899 |
| Cr | -0.017593 | 1.699079 | 19.459291 |
| Cr | -1.480242 | 4.232462 | 19.459291 |
| Cr | 2.907707  | 1.699079 | 19.459291 |
| Cr | 1.445057  | 4.232462 | 19.459291 |
| N  | 1.478242  | 0.835459 | 20.667578 |
| N  | 0.015592  | 3.368842 | 20.667578 |
| N  | 4.403542  | 0.835459 | 20.667578 |
| N  | 2.940892  | 3.368842 | 20.667578 |
| Cr | -2.888318 | 5.045414 | 21.876518 |
| Cr | -1.425668 | 2.512032 | 21.876518 |

|    |           |          |           |
|----|-----------|----------|-----------|
| Cr | 0.036982  | 5.045414 | 21.876518 |
| Cr | 1.499632  | 2.512032 | 21.876518 |
| N  | 0.059714  | 1.654446 | 23.085022 |
| N  | -1.402936 | 4.187829 | 23.085022 |
| N  | 2.985014  | 1.654446 | 23.085022 |
| N  | 1.522364  | 4.187829 | 23.085022 |
| Cr | 1.565720  | 0.784953 | 24.289986 |
| Cr | 0.103070  | 3.318336 | 24.289986 |
| Cr | 4.491020  | 0.784953 | 24.289986 |
| Cr | 3.028370  | 3.318336 | 24.289986 |
| N  | -2.839427 | 5.017188 | 25.493853 |
| N  | -1.376778 | 2.483805 | 25.493853 |
| N  | 0.085872  | 5.017188 | 25.493853 |
| N  | 1.548522  | 2.483805 | 25.493853 |
| Cr | 0.080115  | 1.642671 | 26.691839 |
| Cr | -1.382497 | 4.176028 | 26.691839 |
| Cr | 3.005445  | 1.642650 | 26.691839 |
| Cr | 1.542763  | 4.176049 | 26.691839 |
| N  | 1.549078  | 0.794565 | 27.913855 |
| N  | 0.086405  | 3.327958 | 27.913855 |
| N  | 4.474363  | 0.794570 | 27.913855 |
| N  | 3.011725  | 3.327943 | 27.913855 |
| Ni | -2.839164 | 5.017035 | 28.853340 |
| Ni | -1.376497 | 2.483632 | 28.853340 |
| Ni | 0.086162  | 5.017030 | 28.853340 |
| Ni | 1.548794  | 2.483648 | 28.853340 |
| Cr | 0.077342  | 1.644272 | 30.985628 |
| Cr | -1.385305 | 4.177649 | 30.985592 |
| Cr | 3.002654  | 1.644262 | 30.985628 |

Cr 1.539989 4.177649 30.985628

Model: A full Ni incorporation at T4 site.

89

XCrySDen XSF file

Cr -0.080571 1.735453 5.538329

Cr -1.543236 4.268831 5.538292

Cr 2.844731 1.735438 5.538329

Cr 1.382067 4.268816 5.538329

Ni 5.758611 0.053110 7.655137

Ni 4.295949 2.586513 7.655100

Ni 2.833287 0.053110 7.655100

Ni 1.370635 2.586508 7.655100

N -0.077573 1.733705 8.596630

N -1.540217 4.267088 8.596630

N 2.847724 1.733711 8.596594

N 1.385086 4.267093 8.596630

Cr 1.384465 0.889597 9.819227

Cr -0.078170 3.422975 9.819227

Cr 4.309771 0.889597 9.819227

Cr 2.847118 3.422985 9.819227

N 5.770406 0.046300 11.017179

N 4.307756 2.579683 11.017179

N 2.845106 0.046300 11.017179

N 1.382456 2.579683 11.017179

Cr -0.098989 1.746073 12.219878

Cr -1.561639 4.279456 12.219878

Cr 2.826311 1.746073 12.219878

Cr 1.363661 4.279456 12.219878

|    |           |          |           |
|----|-----------|----------|-----------|
| N  | 1.407350  | 0.876388 | 13.424220 |
| N  | -0.055300 | 3.409771 | 13.424220 |
| N  | 4.332650  | 0.876388 | 13.424220 |
| N  | 2.870001  | 3.409771 | 13.424220 |
| Cr | 5.815874  | 0.020049 | 14.632870 |
| Cr | 4.353230  | 2.553432 | 14.632870 |
| Cr | 2.890576  | 0.020044 | 14.632870 |
| Cr | 1.427924  | 2.553432 | 14.632870 |
| N  | -0.013968 | 1.696987 | 15.842360 |
| N  | -1.476618 | 4.230370 | 15.842360 |
| N  | 2.911332  | 1.696987 | 15.842360 |
| N  | 1.448682  | 4.230370 | 15.842360 |
| Cr | 1.480567  | 0.834116 | 17.051668 |
| Cr | 0.017918  | 3.367499 | 17.051668 |
| Cr | 4.405868  | 0.834116 | 17.051668 |
| Cr | 2.943218  | 3.367499 | 17.051668 |
| N  | 0.000000  | 0.000000 | 18.255899 |
| N  | -2.925300 | 5.066766 | 18.255899 |
| N  | 5.850600  | 0.000000 | 18.255899 |
| N  | 2.925300  | 5.066766 | 18.255899 |
| N  | -1.462650 | 2.533383 | 18.255899 |
| N  | 4.387950  | 2.533383 | 18.255899 |
| N  | 2.925300  | 0.000000 | 18.255899 |
| N  | 0.000000  | 5.066766 | 18.255899 |
| N  | 1.462650  | 2.533383 | 18.255899 |
| Cr | -0.017917 | 1.699267 | 19.460169 |
| Cr | -1.480567 | 4.232649 | 19.460169 |
| Cr | 2.907382  | 1.699267 | 19.460169 |
| Cr | 1.444733  | 4.232649 | 19.460169 |

|    |           |          |           |
|----|-----------|----------|-----------|
| N  | 1.476618  | 0.836396 | 20.669292 |
| N  | 0.013968  | 3.369779 | 20.669292 |
| N  | 4.401918  | 0.836396 | 20.669292 |
| N  | 2.939268  | 3.369779 | 20.669292 |
| Cr | -2.890574 | 5.046717 | 21.878746 |
| Cr | -1.427929 | 2.513334 | 21.878746 |
| Cr | 0.034724  | 5.046721 | 21.878746 |
| Cr | 1.497376  | 2.513334 | 21.878746 |
| N  | 0.055300  | 1.656995 | 23.087360 |
| N  | -1.407350 | 4.190378 | 23.087360 |
| N  | 2.980600  | 1.656995 | 23.087360 |
| N  | 1.517950  | 4.190378 | 23.087360 |
| Cr | 1.561639  | 0.787310 | 24.291958 |
| Cr | 0.098989  | 3.320692 | 24.291958 |
| Cr | 4.486939  | 0.787310 | 24.291958 |
| Cr | 3.024289  | 3.320692 | 24.291958 |
| N  | -2.845106 | 5.020466 | 25.494692 |
| N  | -1.382456 | 2.487083 | 25.494692 |
| N  | 0.080194  | 5.020466 | 25.494692 |
| N  | 1.542844  | 2.487083 | 25.494692 |
| Cr | 0.078182  | 1.643780 | 26.692717 |
| Cr | -1.384471 | 4.177168 | 26.692717 |
| Cr | 3.003470  | 1.643790 | 26.692717 |
| Cr | 1.540835  | 4.177168 | 26.692717 |
| N  | 1.540214  | 0.799672 | 27.915243 |
| N  | 0.077576  | 3.333055 | 27.915277 |
| N  | 4.465517  | 0.799678 | 27.915243 |
| N  | 3.002870  | 3.333066 | 27.915243 |
| Ni | -2.833311 | 5.013656 | 28.856735 |

|    |           |          |           |
|----|-----------|----------|-----------|
| Ni | -1.370649 | 2.480253 | 28.856735 |
| Ni | 0.092013  | 5.013656 | 28.856735 |
| Ni | 1.554665  | 2.480258 | 28.856735 |
| Cr | 1.543233  | 0.797950 | 30.973543 |
| Cr | 0.080569  | 3.331328 | 30.973543 |
| Cr | 4.468536  | 0.797935 | 30.973581 |
| Cr | 3.005872  | 3.331312 | 30.973543 |

Model: 3NiN-N

105

XCrySDen XSF file

|    |           |          |           |
|----|-----------|----------|-----------|
| N  | 1.320021  | 0.926828 | 6.451141  |
| N  | -0.143612 | 3.460758 | 6.457665  |
| N  | 4.244338  | 0.927375 | 6.457459  |
| N  | 2.782653  | 3.460181 | 6.451141  |
| Ni | 2.781486  | 0.083065 | 6.957503  |
| Ni | 1.320656  | 2.615363 | 6.950276  |
| Ni | 5.708588  | 0.081990 | 6.950070  |
| Ni | 4.244107  | 2.616397 | 6.957503  |
| N  | 2.788042  | 0.079199 | 8.825089  |
| N  | 1.322631  | 2.614223 | 8.815386  |
| N  | 5.710624  | 0.080815 | 8.815097  |
| N  | 4.250736  | 2.612648 | 8.825089  |
| Ni | -0.135076 | 1.766796 | 9.544021  |
| Ni | -1.604562 | 4.304238 | 9.543443  |
| Ni | 2.783484  | 1.770799 | 9.543443  |
| Ni | 1.327671  | 4.300346 | 9.544021  |
| N  | -0.117603 | 1.756840 | 11.401739 |
| N  | -1.578901 | 4.289423 | 11.401698 |



|    |           |          |           |
|----|-----------|----------|-----------|
| N  | 2.809022  | 1.756055 | 11.401698 |
| N  | 1.345030  | 4.290193 | 11.401739 |
| Ni | 1.347449  | 0.910969 | 12.301818 |
| Ni | -0.115125 | 3.444311 | 12.302726 |
| Ni | 4.272824  | 0.910928 | 12.302726 |
| Ni | 2.810104  | 3.444352 | 12.301818 |
| N  | 5.737189  | 0.065478 | 13.426523 |
| N  | 4.273776  | 2.599291 | 13.426316 |
| N  | 2.811134  | 0.065924 | 13.426316 |
| N  | 1.349257  | 2.598850 | 13.426523 |
| Cr | -0.104184 | 1.749073 | 14.620682 |
| Cr | -1.566843 | 4.282461 | 14.620641 |
| Cr | 2.821106  | 1.749078 | 14.620641 |
| Cr | 1.358465  | 4.282456 | 14.620682 |
| N  | 1.387089  | 0.888082 | 15.831110 |
| N  | -0.075370 | 3.421359 | 15.831152 |
| N  | 4.312580  | 0.887976 | 15.831152 |
| N  | 2.849742  | 3.421470 | 15.831110 |
| Cr | 5.801130  | 0.028561 | 17.035963 |
| Cr | 4.338498  | 2.561934 | 17.036005 |
| Cr | 2.875848  | 0.028551 | 17.036005 |
| Cr | 1.413180  | 2.561944 | 17.035963 |
| N  | -0.027703 | 1.704916 | 18.244328 |
| N  | -1.490317 | 4.238278 | 18.244328 |
| N  | 2.897633  | 1.704896 | 18.244328 |
| N  | 1.434948  | 4.238299 | 18.244328 |
| Cr | 1.476057  | 0.836721 | 19.447323 |
| Cr | 0.013398  | 3.370108 | 19.447323 |
| Cr | 4.401348  | 0.836726 | 19.447323 |

|    |           |          |           |
|----|-----------|----------|-----------|
| Cr | 2.938707  | 3.370104 | 19.447323 |
| N  | 0.000000  | 0.000000 | 20.645899 |
| N  | -2.925300 | 5.066766 | 20.645899 |
| N  | 5.850600  | 0.000000 | 20.645899 |
| N  | 2.925300  | 5.066766 | 20.645899 |
| N  | -1.462650 | 2.533383 | 20.645899 |
| N  | 4.387950  | 2.533383 | 20.645899 |
| N  | 2.925300  | 0.000000 | 20.645899 |
| N  | 0.000000  | 5.066766 | 20.645899 |
| N  | 1.462650  | 2.533383 | 20.645899 |
| Cr | -0.013442 | 1.696683 | 21.845549 |
| Cr | -1.476091 | 4.230065 | 21.845549 |
| Cr | 2.911858  | 1.696683 | 21.845549 |
| Cr | 1.449208  | 4.230065 | 21.845549 |
| N  | 1.489984  | 0.828680 | 23.049246 |
| N  | 0.027282  | 3.362093 | 23.049246 |
| N  | 4.415231  | 0.828710 | 23.049246 |
| N  | 2.952634  | 3.362062 | 23.049246 |
| Cr | -2.876198 | 5.038417 | 24.258394 |
| Cr | -1.413566 | 2.505044 | 24.258354 |
| Cr | 0.049084  | 5.038427 | 24.258354 |
| Cr | 1.511751  | 2.505034 | 24.258394 |
| N  | 0.075016  | 1.645615 | 25.464403 |
| N  | -1.387850 | 4.179119 | 25.464363 |
| N  | 3.000100  | 1.645736 | 25.464363 |
| N  | 1.537663  | 4.178992 | 25.464403 |
| Cr | 1.566238  | 0.784655 | 26.675657 |
| Cr | 0.103597  | 3.318032 | 26.675657 |
| Cr | 4.491547  | 0.784649 | 26.675657 |

|    |           |          |           |
|----|-----------|----------|-----------|
| Cr | 3.028888  | 3.318038 | 26.675657 |
| N  | -2.812600 | 5.001698 | 27.870850 |
| N  | -1.349096 | 2.467819 | 27.871096 |
| N  | 0.113563  | 5.001207 | 27.871096 |
| N  | 1.575350  | 2.468316 | 27.870850 |
| Ni | 0.114529  | 1.622799 | 28.996050 |
| Ni | -1.348209 | 4.156232 | 28.995018 |
| Ni | 3.039741  | 1.622850 | 28.995018 |
| Ni | 1.577178  | 4.156182 | 28.996050 |
| N  | 1.579644  | 0.776908 | 29.895798 |
| N  | 0.115482  | 3.311167 | 29.895882 |
| N  | 4.503438  | 0.777784 | 29.895882 |
| N  | 3.042300  | 3.310300 | 29.895798 |
| Ni | 1.597319  | 0.766744 | 31.754219 |
| Ni | 0.142333  | 3.295668 | 31.754837 |
| Ni | 4.530257  | 0.762300 | 31.754837 |
| Ni | 3.059940  | 3.300076 | 31.754219 |
| N  | -1.325518 | 2.454220 | 32.473190 |
| N  | -2.785069 | 4.985804 | 32.484215 |
| N  | 1.602863  | 2.452431 | 32.484341 |
| N  | 0.137124  | 4.987587 | 32.473190 |
| Ni | -1.318494 | 2.450141 | 34.340488 |
| Ni | -2.783130 | 4.984684 | 34.348705 |
| Ni | 1.604811  | 2.451306 | 34.348747 |
| Ni | 0.144168  | 4.983544 | 34.340488 |
| N  | 0.142807  | 1.606459 | 34.846725 |
| N  | -1.318731 | 4.139213 | 34.839584 |
| N  | 3.069207  | 1.605840 | 34.839626 |
| N  | 1.605463  | 4.139862 | 34.846725 |

Model: 3Ni<sub>4</sub>N-N

97

XCrySDen XSF file

|    |           |          |           |
|----|-----------|----------|-----------|
| N  | 2.871814  | 1.719802 | 7.119201  |
| Ni | 1.229047  | 1.196446 | 7.220696  |
| Ni | 0.077058  | 3.333354 | 7.502678  |
| Ni | 4.351070  | 0.865753 | 7.176019  |
| Ni | 2.503671  | 3.404157 | 7.220696  |
| N  | 5.794917  | 0.032149 | 8.182672  |
| Ni | -0.147997 | 1.492325 | 9.135687  |
| Ni | -1.701211 | 4.360038 | 8.906848  |
| Ni | 2.895772  | 1.705970 | 8.992363  |
| Ni | 1.558910  | 4.448772 | 9.135687  |
| N  | -0.089210 | 3.429349 | 9.456565  |
| Ni | 5.810450  | 0.023180 | 10.880182 |
| Ni | -1.468231 | 2.734817 | 10.643457 |
| Ni | -0.177238 | 4.970882 | 10.643457 |
| Ni | 1.264464  | 2.647806 | 10.616162 |
| N  | 2.845082  | 1.735236 | 10.978374 |
| Ni | 1.531298  | 1.008352 | 12.410705 |
| Ni | -0.085831 | 3.427398 | 12.495806 |
| Ni | 4.146381  | 0.983930 | 12.414875 |
| Ni | 2.817690  | 3.236447 | 12.410705 |
| N  | 5.774364  | 0.044015 | 13.487966 |
| N  | 4.327142  | 2.590075 | 13.474339 |
| N  | 2.845799  | 0.024315 | 13.474339 |
| N  | 1.338778  | 2.604900 | 13.486025 |
| Cr | -0.098919 | 1.739821 | 14.620766 |

|    |           |          |           |
|----|-----------|----------|-----------|
| Cr | -1.589774 | 4.295700 | 14.588887 |
| Cr | 2.838272  | 1.739167 | 14.662264 |
| Cr | 1.369111  | 4.282522 | 14.620766 |
| N  | 1.389172  | 0.878354 | 15.838378 |
| N  | -0.053553 | 3.408763 | 15.801710 |
| N  | 4.332475  | 0.876490 | 15.836684 |
| N  | 2.859209  | 3.424531 | 15.838378 |
| Cr | 5.807537  | 0.024863 | 17.037161 |
| Cr | 4.344790  | 2.561889 | 17.035303 |
| Cr | 2.879034  | 0.023125 | 17.035303 |
| Cr | 1.416585  | 2.559978 | 17.033197 |
| N  | -0.019398 | 1.702337 | 18.243914 |
| N  | -1.479532 | 4.232051 | 18.240196 |
| N  | 2.908418  | 1.698669 | 18.233095 |
| N  | 1.441334  | 4.232396 | 18.243914 |
| Cr | 1.477320  | 0.836001 | 19.446785 |
| Cr | 0.014837  | 3.369278 | 19.447073 |
| Cr | 4.402708  | 0.835940 | 19.446289 |
| Cr | 2.939962  | 3.369369 | 19.446785 |
| N  | 0.000000  | 0.000000 | 20.645899 |
| N  | -2.925300 | 5.066766 | 20.645899 |
| N  | 5.850600  | 0.000000 | 20.645899 |
| N  | 2.925300  | 5.066766 | 20.645899 |
| N  | -1.462650 | 2.533383 | 20.645899 |
| N  | 4.387950  | 2.533383 | 20.645899 |
| N  | 2.925300  | 0.000000 | 20.645899 |
| N  | 0.000000  | 5.066766 | 20.645899 |
| N  | 1.462650  | 2.533383 | 20.645899 |
| Cr | -0.014863 | 1.697513 | 21.847738 |

|    |           |          |           |
|----|-----------|----------|-----------|
| Cr | -1.477610 | 4.230942 | 21.848234 |
| Cr | 2.910270  | 1.697600 | 21.847406 |
| Cr | 1.447778  | 4.230881 | 21.847738 |
| N  | 1.483698  | 0.834542 | 23.051476 |
| N  | 0.016566  | 3.368279 | 23.062376 |
| N  | 4.404551  | 0.834876 | 23.055235 |
| N  | 2.944414  | 3.364576 | 23.051476 |
| Cr | -2.882736 | 5.042192 | 24.259634 |
| Cr | -1.420019 | 2.505176 | 24.261532 |
| Cr | 0.045743  | 5.043950 | 24.261532 |
| Cr | 1.508232  | 2.507066 | 24.263638 |
| N  | 0.065623  | 1.642519 | 25.459202 |
| N  | -1.407639 | 4.190545 | 25.460854 |
| N  | 2.978379  | 1.658276 | 25.495993 |
| N  | 1.535648  | 4.188675 | 25.459202 |
| Cr | 1.555452  | 0.784741 | 26.677721 |
| Cr | 0.086221  | 3.328064 | 26.636181 |
| Cr | 4.514390  | 0.771461 | 26.709682 |
| Cr | 3.023421  | 3.327335 | 26.677721 |
| N  | -2.850204 | 5.023409 | 27.810232 |
| N  | -1.402547 | 2.477081 | 27.824520 |
| N  | 0.078811  | 5.042866 | 27.824520 |
| N  | 1.585776  | 2.462296 | 27.812916 |
| Ni | 0.106586  | 1.831443 | 28.801029 |
| Ni | -1.221880 | 4.083296 | 28.924904 |
| Ni | 3.010482  | 1.639742 | 28.802391 |
| Ni | 1.392516  | 4.058738 | 28.888567 |
| N  | 0.079296  | 3.332062 | 30.320070 |
| Ni | -2.886853 | 5.044568 | 30.415951 |

|    |           |          |           |
|----|-----------|----------|-----------|
| Ni | 4.392391  | 2.333124 | 30.655071 |
| Ni | 3.100950  | 0.096284 | 30.655071 |
| Ni | 1.659608  | 2.419669 | 30.682945 |
| N  | 3.013386  | 1.638065 | 31.833540 |
| Ni | 1.364076  | 0.619610 | 32.166309 |
| Ni | 0.029449  | 3.360842 | 32.305794 |
| Ni | 4.624905  | 0.707655 | 32.391102 |
| Ni | 3.070740  | 3.575637 | 32.410591 |
| N  | -2.871775 | 5.035864 | 33.035503 |
| Ni | 0.419781  | 1.663824 | 34.077911 |
| Ni | -1.428078 | 4.202345 | 34.122799 |
| Ni | 2.845802  | 1.734820 | 33.835037 |
| Ni | 1.694275  | 3.871313 | 34.077911 |
| N  | 0.051249  | 3.348256 | 34.178955 |

Model: Ni<sub>4</sub>N (111) Surface

96

Ni<sub>4</sub>N\ (1\1\1)

|    |           |          |           |
|----|-----------|----------|-----------|
| Ni | -0.000026 | 2.998195 | 8.560019  |
| Ni | 0.000000  | 0.000000 | 10.679905 |
| Ni | -2.596500 | 4.497270 | 10.679905 |
| Ni | 5.193000  | 0.000000 | 10.679905 |
| Ni | 2.596500  | 4.497270 | 10.679905 |
| Ni | 2.596526  | 1.499075 | 12.800196 |
| Ni | -0.000026 | 2.998195 | 14.920081 |
| Ni | 0.000000  | 0.000000 | 17.039967 |
| Ni | -2.596500 | 4.497270 | 17.039967 |
| Ni | 5.193000  | 0.000000 | 17.039967 |
| Ni | 2.596500  | 4.497270 | 17.039967 |

|    |           |          |           |
|----|-----------|----------|-----------|
| Ni | 2.596526  | 1.499075 | 19.160255 |
| Ni | -0.000026 | 2.998195 | 21.280144 |
| Ni | 0.000000  | 0.000000 | 23.400433 |
| Ni | -2.596500 | 4.497270 | 23.400433 |
| Ni | 5.193000  | 0.000000 | 23.400433 |
| Ni | 2.596500  | 4.497270 | 23.400433 |
| Ni | 2.596526  | 1.499075 | 25.520319 |
| Ni | -0.000026 | 2.998195 | 27.640205 |
| Ni | 0.000000  | 0.000000 | 29.760494 |
| Ni | -2.596500 | 4.497270 | 29.760494 |
| Ni | 5.193000  | 0.000000 | 29.760494 |
| Ni | 2.596500  | 4.497270 | 29.760494 |
| Ni | 2.596526  | 1.499075 | 31.880381 |
| Ni | 2.596474  | 2.998195 | 8.560019  |
| Ni | 2.596500  | 0.000000 | 10.679905 |
| Ni | 0.000000  | 4.497270 | 10.679905 |
| Ni | 0.000026  | 1.499075 | 12.800196 |
| Ni | 2.596474  | 2.998195 | 14.920081 |
| Ni | 2.596500  | 0.000000 | 17.039967 |
| Ni | 0.000000  | 4.497270 | 17.039967 |
| Ni | 0.000026  | 1.499075 | 19.160255 |
| Ni | 2.596474  | 2.998195 | 21.280144 |
| Ni | 2.596500  | 0.000000 | 23.400433 |
| Ni | 0.000000  | 4.497270 | 23.400433 |
| Ni | 0.000026  | 1.499075 | 25.520319 |
| Ni | 2.596474  | 2.998195 | 27.640205 |
| Ni | 2.596500  | 0.000000 | 29.760494 |
| Ni | 0.000000  | 4.497270 | 29.760494 |
| Ni | 0.000026  | 1.499075 | 31.880381 |



|    |           |          |           |
|----|-----------|----------|-----------|
| Ni | 3.894724  | 0.749560 | 8.560019  |
| Ni | 1.298250  | 2.248635 | 10.679905 |
| Ni | -1.298224 | 3.747710 | 12.800196 |
| Ni | 3.894724  | 0.749560 | 14.920081 |
| Ni | 1.298250  | 2.248635 | 17.039967 |
| Ni | -1.298224 | 3.747710 | 19.160255 |
| Ni | 3.894724  | 0.749560 | 21.280144 |
| Ni | 1.298250  | 2.248635 | 23.400433 |
| Ni | -1.298224 | 3.747710 | 25.520319 |
| Ni | 3.894724  | 0.749560 | 27.640205 |
| Ni | 1.298250  | 2.248635 | 29.760494 |
| Ni | -1.298224 | 3.747710 | 31.880381 |
| Ni | 1.298224  | 0.749560 | 8.560019  |
| Ni | -1.298250 | 2.248635 | 10.679905 |
| Ni | 3.894750  | 2.248635 | 10.679905 |
| Ni | 1.298276  | 3.747710 | 12.800196 |
| Ni | 1.298224  | 0.749560 | 14.920081 |
| Ni | -1.298250 | 2.248635 | 17.039967 |
| Ni | 3.894750  | 2.248635 | 17.039967 |
| Ni | 1.298276  | 3.747710 | 19.160255 |
| Ni | 1.298224  | 0.749560 | 21.280144 |
| Ni | -1.298250 | 2.248635 | 23.400433 |
| Ni | 3.894750  | 2.248635 | 23.400433 |
| Ni | 1.298276  | 3.747710 | 25.520319 |
| Ni | 1.298224  | 0.749560 | 27.640205 |
| Ni | -1.298250 | 2.248635 | 29.760494 |
| Ni | 3.894750  | 2.248635 | 29.760494 |
| Ni | 1.298276  | 3.747710 | 31.880381 |
| N  | 0.000000  | 0.000000 | 7.500076  |

|   |           |          |           |
|---|-----------|----------|-----------|
| N | -2.596500 | 4.497270 | 7.500076  |
| N | 5.193000  | 0.000000 | 7.500076  |
| N | 2.596500  | 4.497270 | 7.500076  |
| N | 2.596526  | 1.499075 | 9.619963  |
| N | -0.000026 | 2.998195 | 11.740252 |
| N | 0.000000  | 0.000000 | 13.860137 |
| N | -2.596500 | 4.497270 | 13.860137 |
| N | 5.193000  | 0.000000 | 13.860137 |
| N | 2.596500  | 4.497270 | 13.860137 |
| N | 2.596526  | 1.499075 | 15.980024 |
| N | -0.000026 | 2.998195 | 18.100315 |
| N | 0.000000  | 0.000000 | 20.220200 |
| N | -2.596500 | 4.497270 | 20.220200 |
| N | 5.193000  | 0.000000 | 20.220200 |
| N | 2.596500  | 4.497270 | 20.220200 |
| N | 2.596526  | 1.499075 | 22.340086 |
| N | -0.000026 | 2.998195 | 24.460375 |
| N | 0.000000  | 0.000000 | 26.580261 |
| N | -2.596500 | 4.497270 | 26.580261 |
| N | 5.193000  | 0.000000 | 26.580261 |
| N | 2.596500  | 4.497270 | 26.580261 |
| N | 2.596526  | 1.499075 | 28.700146 |
| N | -0.000026 | 2.998195 | 30.820436 |
| N | 0.000000  | 0.000000 | 32.940323 |
| N | -2.596500 | 4.497270 | 32.940323 |
| N | 5.193000  | 0.000000 | 32.940323 |
| N | 2.596500  | 4.497270 | 32.940323 |

## References

- [1] J. P. Perdew, A. Zunger, *Phys. Rev. B.*, 1981, **23**, 5048.
- [2] Perdew, J. P., Burke, K., & Ernzerhof, M. *Phys. Rev. Lett.*, 1996, **77**, 3865.
- [3] M. Cococcioni, S. de Gironcoli, *Phys. Rev. B.*, 2005, **71**, 035105.
- [4] Ghosal, S., Dutta, K., Chowdhury, S., & Jana, D. *J. Phys. D Appl. Phys.*, 55, **2022**, 375303.
- [5] Widita, R., Muhammadiyah, S., Prasetiyawati, R. D., Marlina, R., Suryanegara, L., Purnama, B., ... & Darma, Y. *ACS omega*, 6, **2021**, 4440-4447.
- [6] German, E., Faccio, R., & Mombrú, A. W. *J. Phys. Commun.*, 1, **2017**, 055006.
- [7] A. Filippetti, W. E. Pickett, B. M. Klein, *Phys. Rev. B.*, 1999, **59**, 7043.
- [8] H. J. Monkhorst, J. D. Pack, *Phys. Rev. B.*, 1976, **13**, 5188.
- [9] Ponce-Pérez, R., Cicoletzi, G. H., & Takeuchi, N. *App. Surf. Sci.*, **573**, 2022, 151451.
- [10] Alam, K., Haider, M. B., Al-Kuhaili, M. F., Ziq, K. A., & Haq, B. U. *Ceramics International*, 48, **2022**, 17352-17358.
- [11] Corliss, L. M., Elliott, N., & Hastings, J. M. *Phys. Rev.*, 117, **1960** 929.
